# Supplementary material for: Genomic Analysis of the Function of the Transcription Factor gata3 during Development of the Mammalian Inner Ear
Source: PLoS One. 2009 Sep 23;4(9):e7144. doi: 10.1371/journal.pone.0007144 (PMC2742898; doi:10.1371/journal.pone.0007144)
Supplement: Table S4 — Correlation between gene expression level calculated by mgMOS and measured by qRT-PCR (0.02 MB XLS) [file pone.0007144.s005.xls]

## Sheet: Sheet1
Table S4 - Correlation between gene expression level calculated by mgMOS and measured by qRT-PCR
Gene	qRT-PCR delta ct	mgMOS - Log2 Gene Expression in E36 at day 2
Akt1	12.32	9.1
Akt2	17	9.5
Atp1a2	30	0
Bad	16	8
Ccnd1	13.2	11.5
Cdc42	15	10.2
Cdkn1b	16	7.5
Clcn7	17.3	8.6
Cry1	20.7	7
Cryl1	19.8	5.3
Ctnnb1	14.8	11.2
Cyp2b10	30	1.9
Dusp1	18.4	8.6
FoxM1	16.8	7
Gas2	19.7	4.1
Gata3	14.6	9.6
Igf1	19	8.1
Igf1r	14.6	9.8
Igf2	12.5	12.2
Igfbp2	13	10.3
Igfbp3	15.7	7.8
Igfbp7	23	3
Igfbpl1	29.6	1.4
Ilk	18.65	9.2
Inpp5d	30	2.5
Irak1	18.45	8.8
Irs1	20.7	2.7
Itga6	15	8
Itgb1	12	11.7
Mapk3	14.5	7.4
Mapk8	17.22	7.6
Mapk8ip1	23.9	7.9
Mapk8ip3	20.4	6.6
Mapt	19.3	4.6
Mknk1	17.7	4.2
Mlf2	17.4	8.8
Mmp11	19.7	8.3
pdgfra	21.6	4.7
pdpk1	17.6	5.8
Pex2 (Pxmp3)	21.1	8.1
Pik3ca	17.6	6.5
Pik3r2	15.47	7.9
Pitpna	18	6.3
Ppp2cb	16.39	10
Ppp2r1a	14.51	10.6
Prkaca	13.25	9.4
Prkca	18.5	7
Prkcb1	27.4	4.7
Prkcz	18	6.7
Pten	14.5	10.5
Ptk2	18.39	6.9
Ptpn11	15.54	3.6
Rbl2	18.09	6.9
Scn3a	30	0
Serpind1	25.15	4.4
Shh	30	3.2
Slc11a2	19.4	7
Slc34a1	30.2	3.9
Sos1	17.9	6.7
Sparcl1	24.7	0.9
Ywhaz	14.15	10
